# Supplementary material
Source: PubMed Central journal article supplement (PMC4785508)
Supplement: ct5b01148_si_001.pdf [file ct5b01148_si_001.pdf]

# Supporting Information

## for

# "Efficient and Flexible Computation of Many-Electron Wave Function Overlaps"

Felix Plasser,\* Matthias Ruckebauer, Sebastian Mai, Markus Oppel, Philipp  
Marquetand, and Leticia González\*

*Institute for Theoretical Chemistry, University of Vienna, Währingerstr. 17, 1090 Vienna*

E-mail: felix.plasser@univie.ac.at; leticia.gonzalez@univie.ac.at

Table 1: Molecular coordinates (a.u.) and CASSCF(6,5)/ANO-RCC-VDZP total energies (a.u.) of selenoacroleine for  $\theta = 50$ .

|    | charge | x          | y           | z           | mass        |
|----|--------|------------|-------------|-------------|-------------|
| Se | 34.0   | 0.00000000 | 0.00000000  | 0.00000000  | 79.91652050 |
| C  | 6.0    | 3.35609824 | 0.00000000  | 0.00000000  | 12.00000000 |
| C  | 6.0    | 4.91982834 | 0.00000000  | 2.23103045  | 12.00000000 |
| C  | 6.0    | 7.46871085 | -0.00209760 | 2.11282803  | 12.00000000 |
| H  | 1.0    | 4.34389628 | 0.00073699  | -1.79701688 | 1.00782504  |
| H  | 1.0    | 3.96957918 | 0.00289128  | 4.04061401  | 1.00782504  |
| H  | 1.0    | 8.48096195 | 1.33176612  | 0.94350284  | 1.00782504  |
| H  | 1.0    | 8.58005922 | -1.34225410 | 3.18747791  | 1.00782504  |

Total energies:

|       |                 |
|-------|-----------------|
| $S_0$ | -2543.961666228 |
| $S_1$ | -2543.914664883 |
| $T_1$ | -2543.917701373 |
| $T_2$ | -2543.916940954 |

---

\*To whom correspondence should be addressed

Table 2: Molecular coordinates (a.u.) and CASSCF(6,5)/ANO-RCC-VDZP total energies (a.u.) of selenoacroleine for  $\theta = 55$ .

|    | charge | x          | y           | z           | mass        |
|----|--------|------------|-------------|-------------|-------------|
| Se | 34.0   | 0.00000000 | 0.00000000  | 0.00000000  | 79.91652050 |
| C  | 6.0    | 3.35609824 | 0.00000000  | 0.00000000  | 12.00000000 |
| C  | 6.0    | 4.91982834 | 0.00000000  | 2.23103045  | 12.00000000 |
| C  | 6.0    | 7.46871085 | -0.00209760 | 2.11282803  | 12.00000000 |
| H  | 1.0    | 4.34389628 | 0.00073699  | -1.79701688 | 1.00782504  |
| H  | 1.0    | 3.96957918 | 0.00289128  | 4.04061401  | 1.00782504  |
| H  | 1.0    | 8.48663113 | 1.42440053  | 1.06397292  | 1.00782504  |
| H  | 1.0    | 8.57437115 | -1.43519087 | 3.06659209  | 1.00782504  |

Total energies:

|       |                 |
|-------|-----------------|
| $S_0$ | -2543.953718502 |
| $S_1$ | -2543.911140703 |
| $T_1$ | -2543.916763113 |
| $T_2$ | -2543.913370031 |

Table 3: Molecular coordinates (a.u.) and CASSCF(12,9)/LANL2DZ+6-31G\* total energies (a.u.) of Ir(C<sub>3</sub>H<sub>4</sub>N)<sub>3</sub>.

|    | charge | x           | y           | z           | mass         |
|----|--------|-------------|-------------|-------------|--------------|
| Ir | 77.0   | 0.00000000  | 0.00000000  | -0.01329000 | 192.21700000 |
| N  | 7.0    | 1.80010200  | -2.88697100 | -2.13249500 | 14.00670000  |
| N  | 7.0    | -3.40024100 | -0.11544800 | -2.13249500 | 14.00670000  |
| C  | 6.0    | -0.90979600 | 3.01827600  | 2.02816800  | 12.01070000  |
| C  | 6.0    | 3.06880100  | -0.72123200 | 2.02816800  | 12.01070000  |
| C  | 6.0    | 3.89138200  | -3.69239700 | -1.14545400 | 12.01070000  |
| C  | 6.0    | 4.66122000  | -2.55908600 | 1.16433200  | 12.01070000  |
| N  | 7.0    | 1.60013900  | 3.00241900  | -2.13249500 | 14.00670000  |
| C  | 6.0    | -2.15900500 | -2.29704400 | 2.02816800  | 12.01070000  |
| C  | 6.0    | 1.25201800  | 5.21623400  | -1.14545400 | 12.01070000  |
| C  | 6.0    | -0.11437700 | 5.31627800  | 1.16433200  | 12.01070000  |
| C  | 6.0    | -5.14340000 | -1.52383700 | -1.14545400 | 12.01070000  |
| C  | 6.0    | -4.54684300 | -2.75719200 | 1.16433200  | 12.01070000  |
| H  | 1.0    | 3.54963500  | 0.20333600  | 3.80678600  | 1.00794000   |
| H  | 1.0    | 6.37476200  | -3.16092400 | 2.11423500  | 1.00794000   |
| H  | 1.0    | 4.98544300  | -5.17760000 | -2.06307100 | 1.00794000   |
| H  | 1.0    | 1.99121100  | 6.90632000  | -2.06307100 | 1.00794000   |
| H  | 1.0    | -0.44994000 | 7.10116800  | 2.11423500  | 1.00794000   |
| H  | 1.0    | -1.95091200 | 2.97240600  | 3.80678600  | 1.00794000   |
| H  | 1.0    | -5.92482200 | -3.94024400 | 2.11423500  | 1.00794000   |
| H  | 1.0    | -1.59872300 | -3.17574200 | 3.80678600  | 1.00794000   |
| H  | 1.0    | -6.97665500 | -1.72872100 | -2.06307100 | 1.00794000   |
| H  | 1.0    | 1.26111400  | -3.71441700 | -3.76807100 | 1.00794000   |
| H  | 1.0    | 2.58622300  | 2.94936500  | -3.76807100 | 1.00794000   |
| H  | 1.0    | -3.84733700 | 0.76505200  | -3.76807100 | 1.00794000   |

Total energies:

|       |                |
|-------|----------------|
| $S_0$ | -614.932489444 |
| $S_1$ | -614.780433920 |
| $S_2$ | -614.780433856 |
| $S_3$ | -614.779275581 |
| $S_4$ | -614.770666413 |
| $S_5$ | -614.770666349 |
| $S_6$ | -614.767439924 |
| $S_7$ | -614.762725810 |
| $S_8$ | -614.762725728 |
| $S_9$ | -614.705153779 |
